# Supplementary material for: Controlling Shear Rate for Designable Thermal Conductivity in Direct Ink Printing of Polydimethylsiloxane/Boron Nitride Composites
Source: MDPI journal article supplement (doi:10.3390/polym15163489), 2023-08-21
Supplement: s1 [file s1]

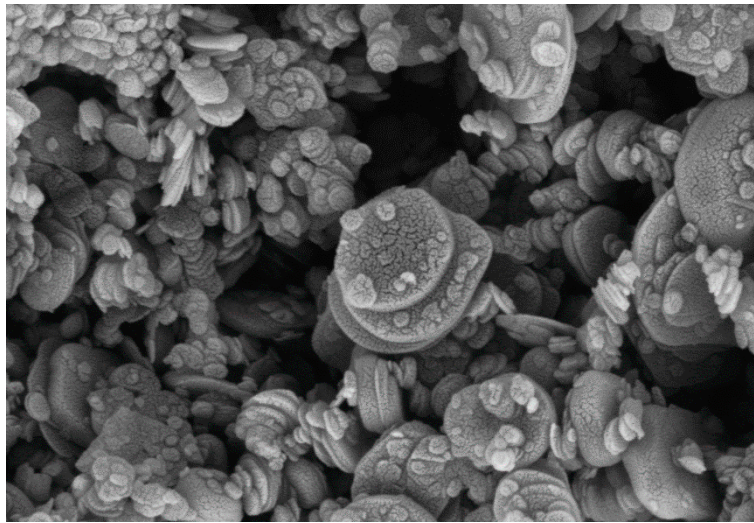

**Figure S1.** SEM image of BN two-dimensional nanosheet.

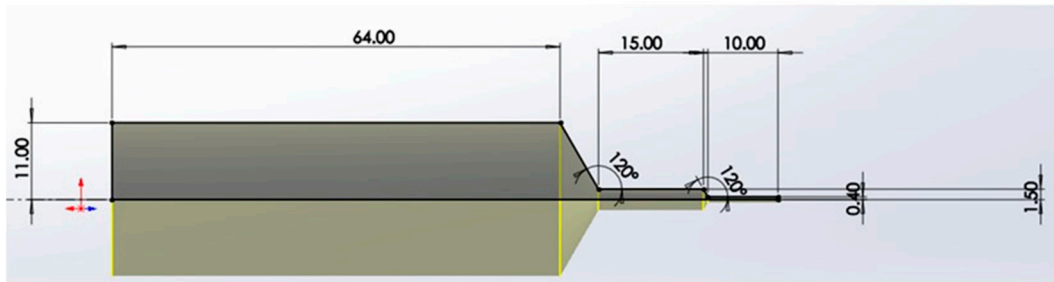

**Figure S2.** DIW barrel geometry for POLYFLOW simulations.

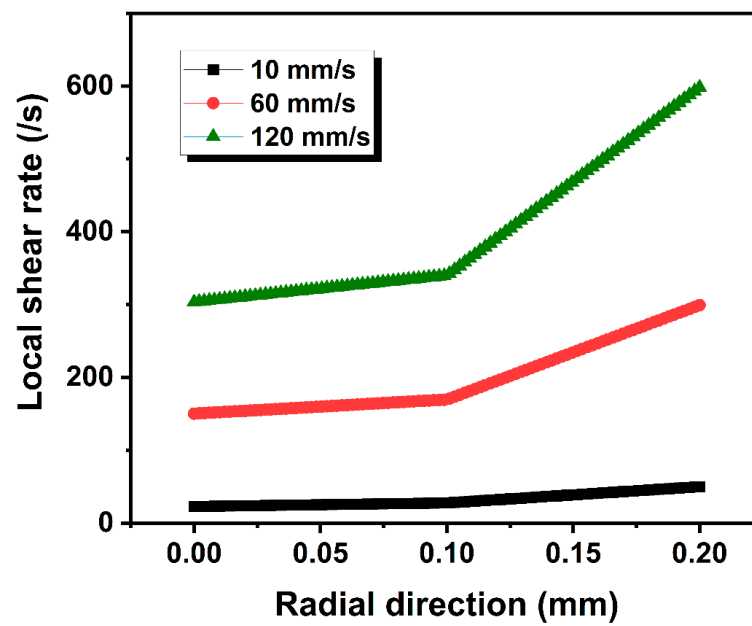

**Figure S3.** The detailed values of the shear field distribution along the radial direction of the nozzle.

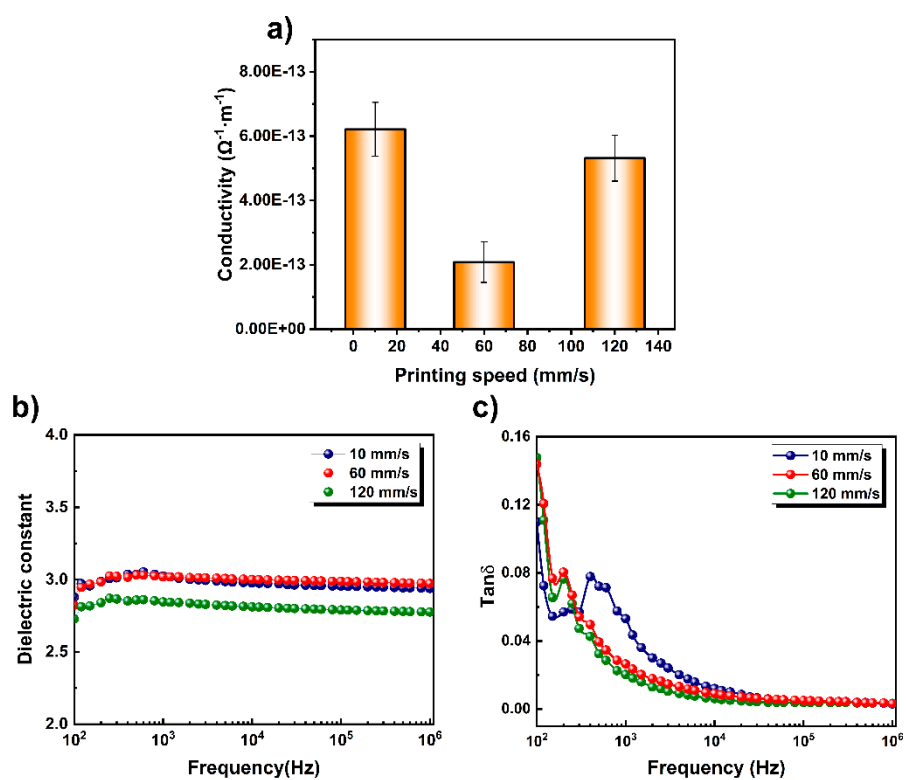

**Figure S4.** Electrical and dielectric properties of the printed PDMS/BN composites with various speeds. a) volume resistivity, b) dielectric constant, and c) dielectric loss.
